# Supplementary material
Source: Springer Nature journal article supplement (https://www.springermedizin.de/resource/supplementary/13023_2013_707_MOESM6_ESM.pdf/9642896)

**A**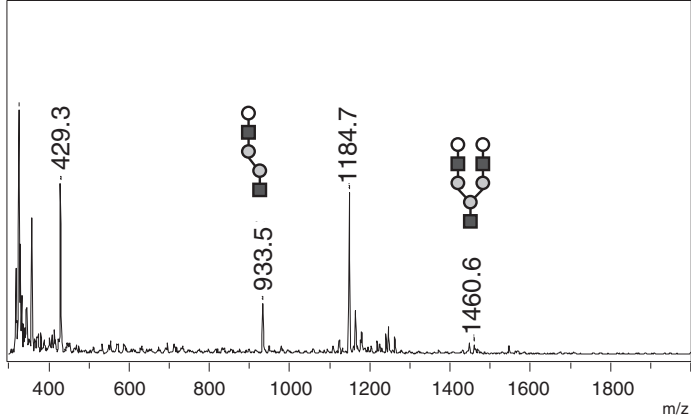**B**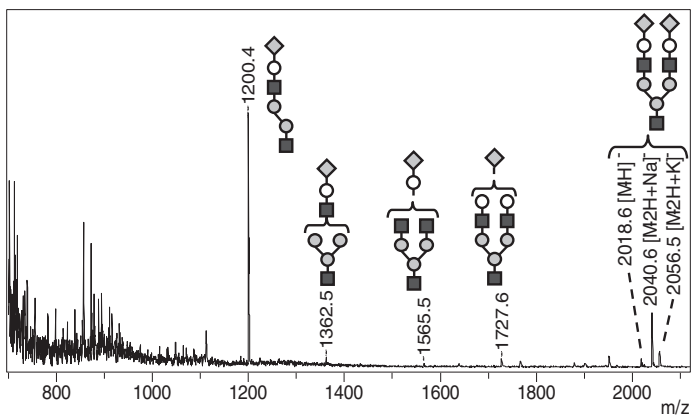**C**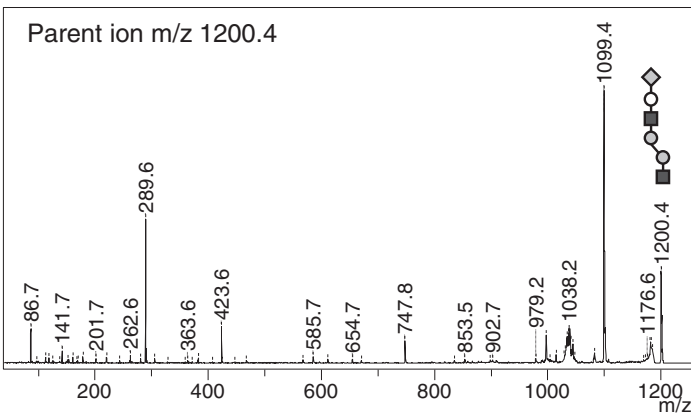

Supplement: MOESM6 [file 9642896]
